# Supplementary material
Source: PubMed Central journal article supplement (PMC2709065)

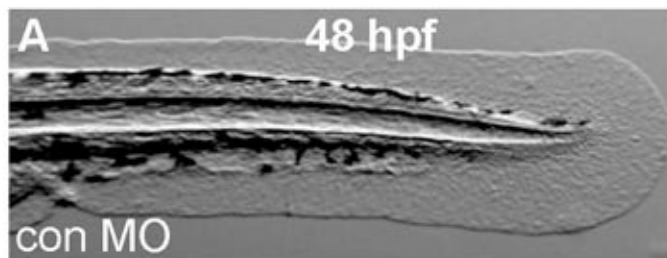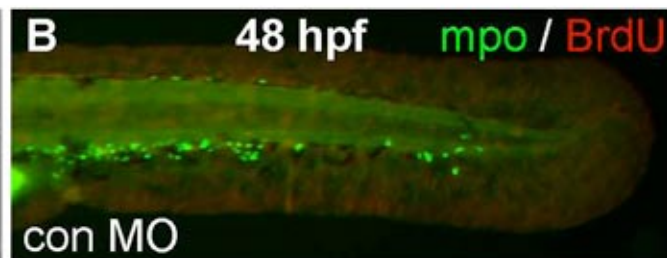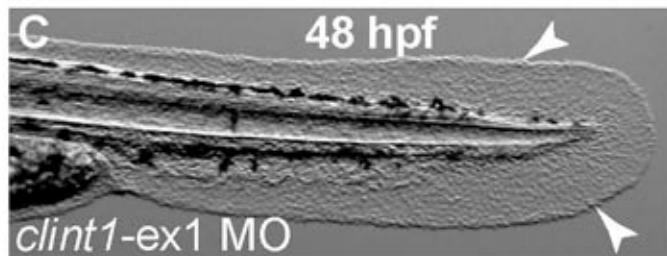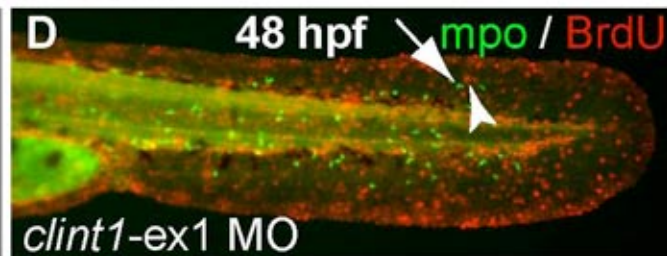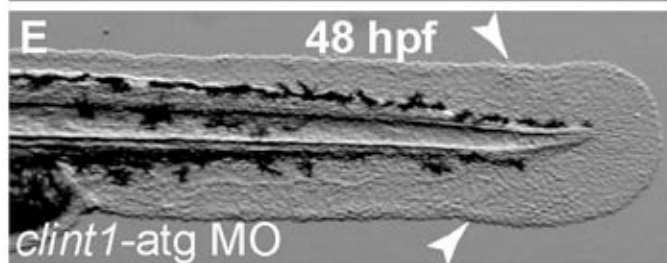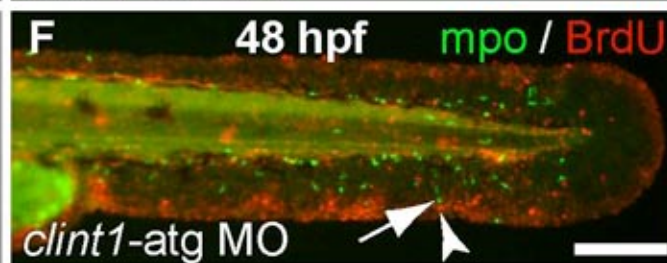

Supplement: supp_136_15_2591__3.pdf [file supp_136_15_2591__3.pdf]
